# Supplementary material
Source: PubMed Central journal article supplement (PMC4135013)
Supplement: NIHMS607621-supplement-1.pdf [file NIHMS607621-supplement-1.pdf]

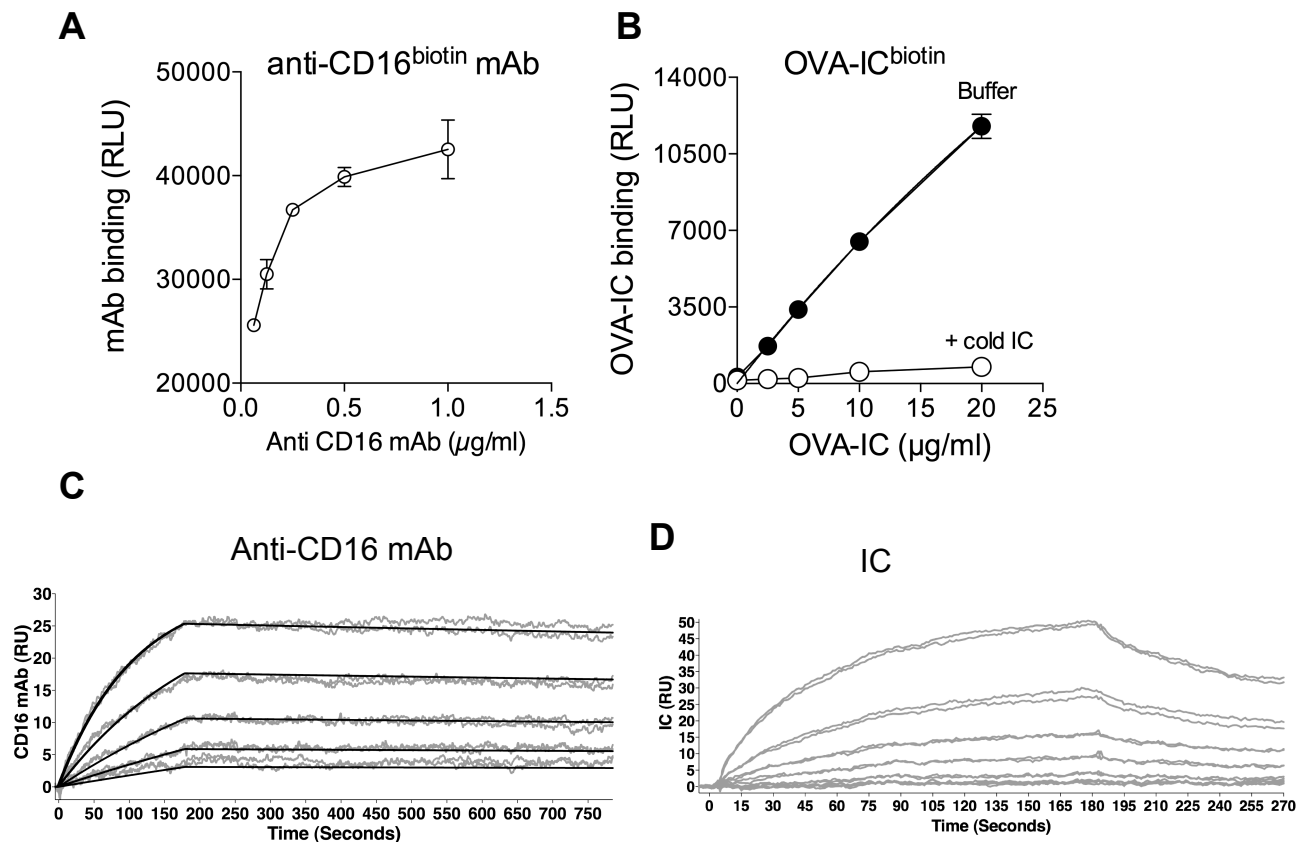

**Figure S1: Dose dependent binding of anti-CD16 mAb and IC to sCD16.** Mouse sCD16 (2.5 µg/mL) was coated on luminescence white plate. Anti-CD16 mAb, 2.4G2<sup>biotin</sup> (A) or soluble OVA-IC<sup>biotin</sup> (B) was added at different concentration and binding was detected using streptavidin-alkaline phosphatase followed by the addition on Lumophos 530 and luminescence was read in a BioTek microplate reader. To determine the specificity of OVA-IC<sup>biotin</sup> binding to sCD16 unlabeled-OVA-IC (cold IC) was added to sCD16-coated wells before the addition of OVA-IC<sup>biotin</sup>. Values are mean ± SD. Representation of two independent experiments is presented. Surface plasmon resonance (SPR) analysis of anti-CD16 mAb (C) and IC (D) was carried out using a Biacore 3000 on CM5 biosensor chips to determine sCD16 binding kinetics. Detailed methods are described in the ‘Methods section’.

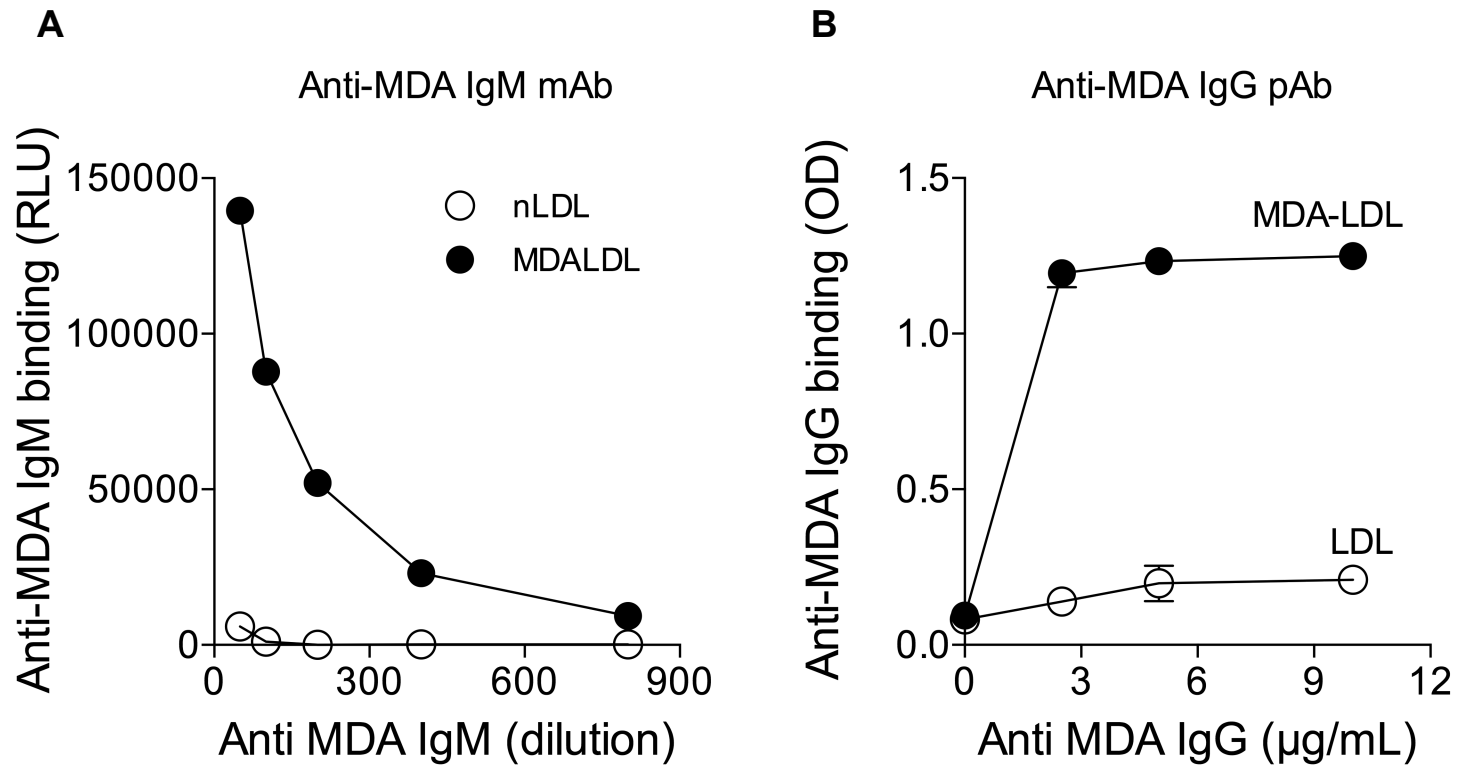

**Figure S2: Specificity of anti-MDA IgM mAb and anti-MDA IgG pAb.** LDL or MDALDL (2 µg/mL) was coated on luminescence white plate. Mouse anti MDA IgM mAb, E012 (**A**) or rabbit anti-MDA IgG (**B**) was added at different concentration and binding was detected using alkaline phosphatase conjugated goat anti-mouse IgM (**A**) or goat anti-rabbit IgG (**B**) followed by the addition on Lumophos 530 and luminescence was read in a BioTek microplate reader. Values are mean ± SD. Representation of two independent experiments is presented.

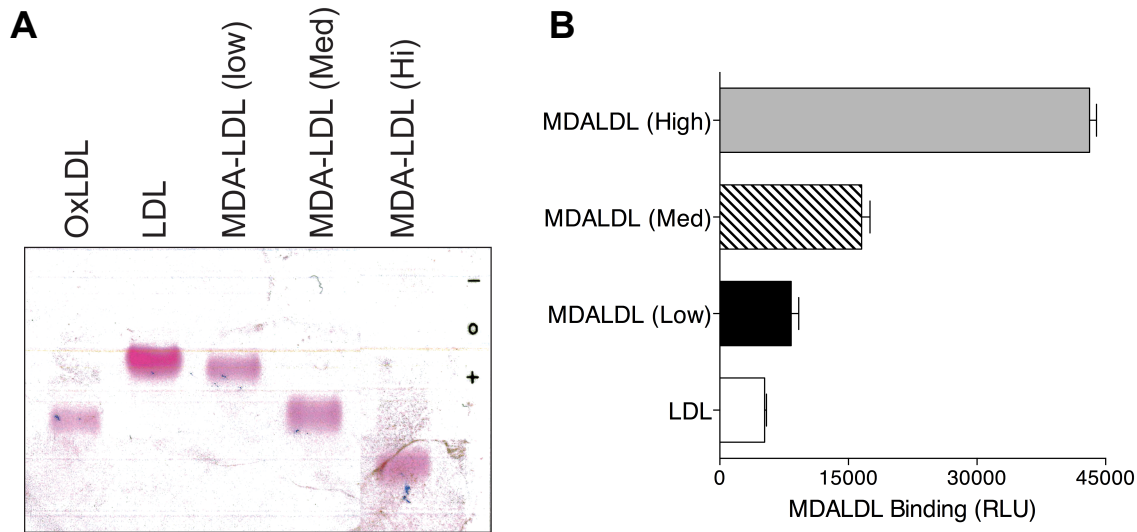

**Figure S3: sCD16 binding to MDALDL dependent on extent of MDA epitope. A.** Electrophoretic mobility of LDL and MDALDL with different levels of MDA epitope. LDL and MDA-modified LDL and oxLDL was separated on agarose gel (TITAN gel) and stained with Fat Red. **B,** CD16 binding to MDALDL with different levels of MDA modification. sCD16 (2.5  $\mu\text{g}/\text{mL}$ ) was coated on luminescence white plate. LDL<sup>biotin</sup> and biotinylated LDL modified with low, medium and high MDA epitope binding was detected streptavidin-alkaline phosphatase followed by the addition on Lumiphos 530 and luminescence was read in a BioTek microplate reader. Values are mean  $\pm$  SD. Representation of three independent experiments is presented.

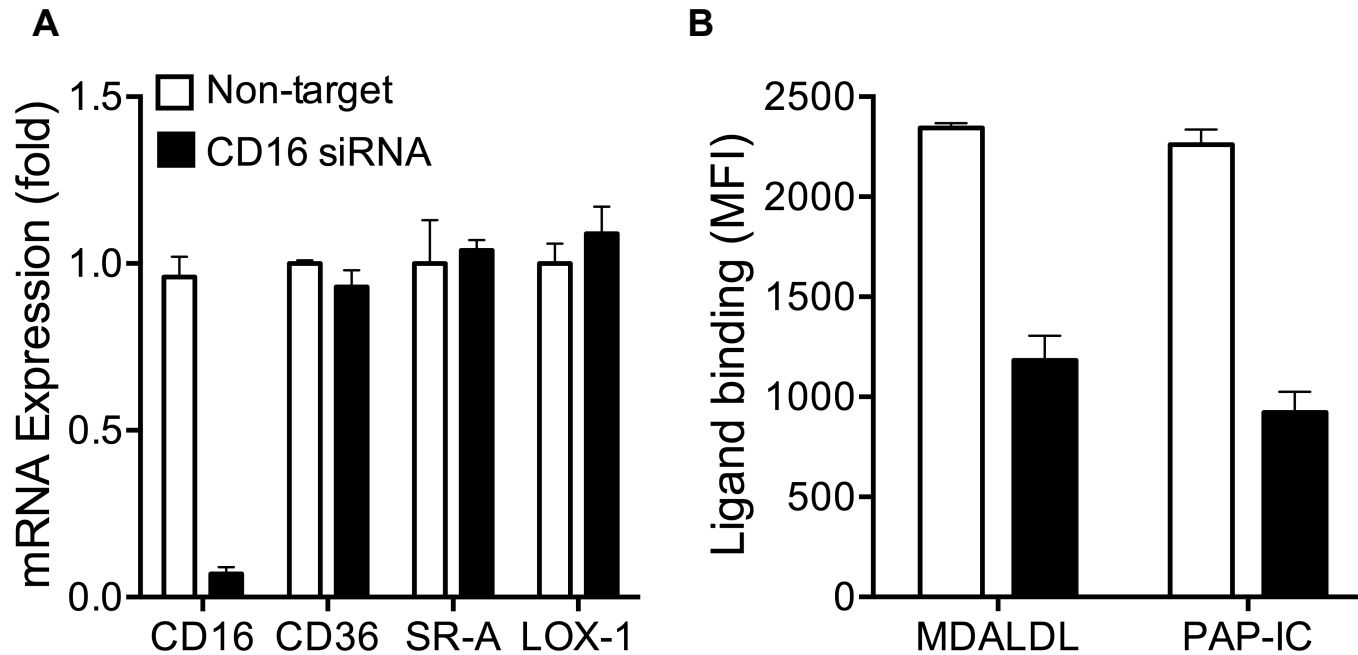

**Figure S4. CD16 silencing reduces MDALDL and sIC binding.** **A.** mRNA expression of CD16 and other scavenger receptors in CD16 silenced and non-target siRNA treated J774 cells was analyzed by quantitative RT-PCR. PCR primer pairs were purchased from Qiagen RT<sup>2</sup>-PCR assay. mRNA expression was normalized to  $\beta$ -actin, house keeping gene. Values (fold change) are mean  $\pm$  SD of triplicate wells. Representation to six independent experiments is presented. **B,** CD16 silenced and non-target siRNA treated J774 cells were treated with indicated ligands (10  $\mu$ g/mL) followed by streptavidin-PE to determine MDALDL<sup>biotin</sup> and sIC (PAP-IC<sup>biotin</sup>) binding. Samples were analyzed in BD-Fortessa flow cytometer. Values (MFI) are mean  $\pm$  SD of duplicates. Representation to two independent experiments is presented.
